# Supplementary material for: Noninferiority of Silver Diamine Fluoride vs Sealants for Reducing Dental Caries Prevalence and Incidence: A Randomized Clinical Trial
Source: PubMed Central journal article supplement (PMC10913007; doi:10.1001/jamapediatrics.2023.6770), 2024-03-04
Supplement: jamapediatr-e236770-s002.pdf [file jamapediatr-e236770-s002.pdf]

## Supplemental Online Content

Ruff RR, Barry Godín T, Niederman R. Noninferiority of silver diamine fluoride vs sealants for reducing dental caries prevalence and incidence: a randomized clinical trial. *JAMA Pediatr*. Published online February 26, 2024.  
doi:10.1001/jamapediatrics.2023.6770

**eTable 1.** Longitudinal caries incidence and the effect of sealants with ART compared to silver diamine fluoride, full sample

**eFigure.** CONSORT diagram, COVID-19 sample

**eTable 2.** Sample demographics overall and by treatment, COVID-19 sample

**eTable 3.** Longitudinal caries prevalence and the effect of sealants with ART compared to silver diamine fluoride, COVID-19 sample

**eTable 4.** Longitudinal caries incidence and the effect of sealants with ART compared to silver diamine fluoride, COVID-19 sample

This supplemental material has been provided by the authors to give readers additional information about their work.

eTable 1. Longitudinal caries incidence and the effect of sealants with ART compared to silver diamine fluoride, full sample

|                         | IRR    | SE    | p-value | 95% L  | 95% U  |
|-------------------------|--------|-------|---------|--------|--------|
| Observational period    | 0.828  | 0.009 | < .001  | 0.810  | 0.846  |
| Active control (vs exp) | 0.924  | 0.053 | 0.172   | 0.825  | 1.035  |
| Baseline decay          | 17.277 | 1.018 | < .001  | 15.393 | 19.391 |
| Previous care           | 0.758  | 0.076 | 0.005   | 0.624  | 0.922  |
| Sex (male)              | 1.050  | 0.055 | 0.349   | 0.948  | 1.164  |
| Race/Ethnicity          |        |       |         |        |        |
| Black                   | 0.987  | 0.068 | 0.854   | 0.863  | 1.130  |
| White                   | 0.721  | 0.133 | 0.076   | 0.503  | 1.035  |
| Asian                   | 0.907  | 0.170 | 0.602   | 0.627  | 1.310  |
| More than one           | 0.932  | 0.208 | 0.752   | 0.602  | 1.442  |
| Other                   | 1.742  | 0.304 | 0.001   | 1.237  | 2.452  |
| Unreported              | 0.931  | 0.071 | 0.351   | 0.801  | 1.082  |

*Notes: total number of teeth at each observation with untreated dental caries was the outcome. Includes all retained children enrolled in the CariedAway study.*

eFigure. CONSORT diagram, COVID-19 sample

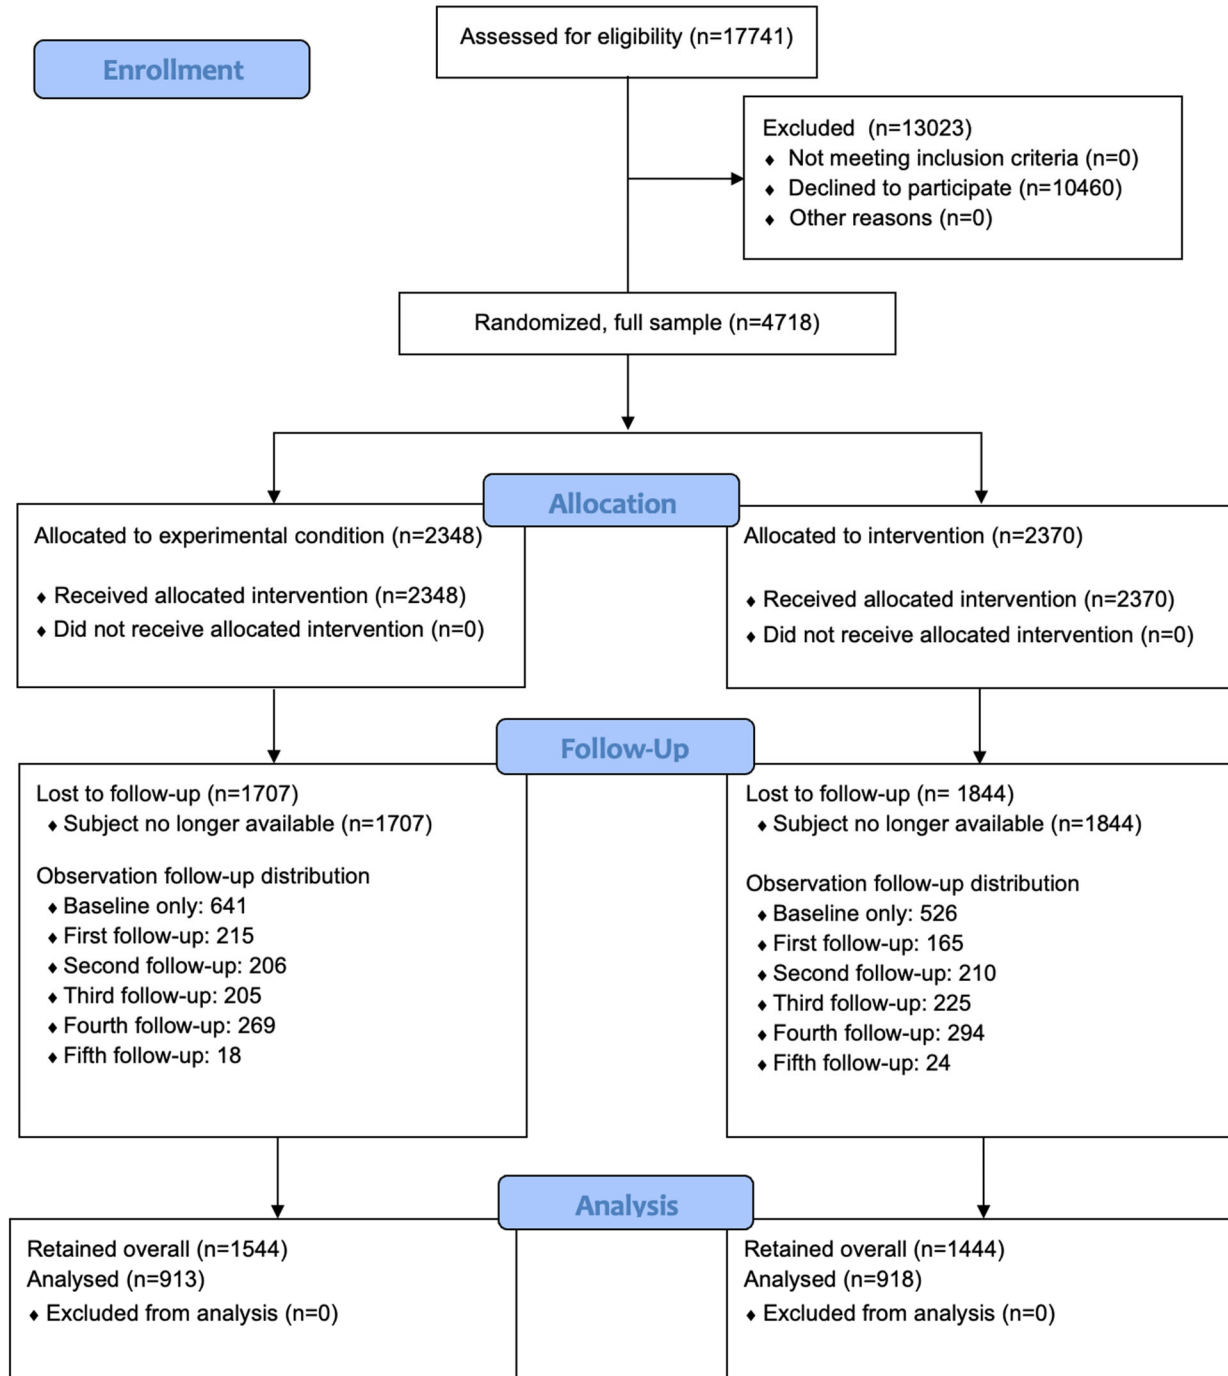

**Notes:** This CONSORT diagram reflects those subjects in the CarriedAway trial who were enrolled, randomized, and treated in the six months prior to school shutdowns due to COVID-19. This subsample ensures that all children analyzed had the same elapsed time between observations.

eTable 2. Sample demographics overall and by treatment, COVID-19 sample

|                 | Overall |           | Experimental |           | Active Control |           |
|-----------------|---------|-----------|--------------|-----------|----------------|-----------|
|                 | N       | %         | N            | %         | N              | %         |
| Participants    | 2998    | 100       | 1554         | 51.83     | 1444           | 48.17     |
| Baseline decay  | 874     | 29.15     | 482          | 31.02     | 392            | 27.15     |
| Sex (male)      | 1432    | 47.77     | 664          | 45.98     | 769            | 49.42     |
| Race/Ethnicity  |         |           |              |           |                |           |
| Hispanic        | 1631    | 54.4      | 810          | 52.12     | 821            | 56.86     |
| Black           | 558     | 18.61     | 311          | 20.01     | 247            | 17.11     |
| White           | 75      | 2.5       | 36           | 2.32      | 39             | 2.7       |
| Asian           | 44      | 1.47      | 29           | 1.87      | 15             | 1.04      |
| More than one   | 58      | 1.93      | 34           | 2.19      | 24             | 1.66      |
| Other           | 41      | 1.37      | 24           | 1.54      | 17             | 1.18      |
| Unreported      | 591     | 19.71     | 310          | 19.95     | 281            | 19.46     |
| Age at baseline | 6.63    | 1.24 (SD) | 6.62         | 1.25 (SD) | 6.65           | 1.24 (SD) |

*Notes: sample includes any subject that (1) was enrolled in the six-month data collection period prior to school shutdowns due to COVID-19 and (2) completed a follow-up observation upon resumption of study activities.*

eTable 3. Longitudinal caries prevalence and the effect of sealants with ART compared to silver diamine fluoride, COVID-19 sample

|                         | OR    | SE    | p      | 95% L | 95% U |
|-------------------------|-------|-------|--------|-------|-------|
| Observational period    | 0.789 | 0.025 | < .001 | 0.741 | 0.84  |
| Active control (vs exp) | 1.04  | 0.125 | 0.763  | 0.819 | 1.31  |
| Baseline decay          | 46.57 | 7.18  | < .001 | 34.43 | 62.99 |
| Previous care           | 0.744 | 0.152 | 0.148  | 0.499 | 1.11  |
| Sex (Males)             | 1.04  | 0.125 | 0.751  | 0.821 | 1.31  |
| Race/Ethnicity          |       |       |        |       |       |
| Black                   | 1.04  | 0.158 | 0.797  | 0.772 | 1.4   |
| White                   | 0.89  | 0.342 | 0.757  | 0.418 | 1.89  |
| Asian                   | 0.489 | 0.224 | 0.118  | 0.2   | 1.2   |
| More than one           | 0.663 | 0.363 | 0.454  | 0.227 | 1.94  |
| Other                   | 2.05  | 0.844 | 0.08   | 0.917 | 4.59  |
| Unreported              | 1.07  | 0.205 | 0.723  | 0.735 | 1.56  |

eTable 4. Longitudinal caries incidence and the effect of sealants with ART compared to silver diamine fluoride, COVID-19 sample

|                         | IRR    | SE    | p-value | 95% L  | 95% U  |
|-------------------------|--------|-------|---------|--------|--------|
| Observational period    | 0.816  | 0.013 | < .001  | 0.792  | 0.841  |
| Active control (vs exp) | 0.995  | 0.079 | 0.948   | 0.851  | 1.163  |
| Baseline decay          | 12.678 | 0.106 | < .001  | 10.770 | 14.930 |
| Previous care           | 0.776  | 0.103 | 0.056   | 0.598  | 1.001  |
| Sex (male)              | 1.030  | 0.078 | 0.651   | 0.893  | 1.120  |
| Race/Ethnicity          |        |       |         |        |        |
| Black                   | 1.000  | 0.097 | 0.964   | 0.832  | 1.213  |
| White                   | 0.878  | 0.217 | 0.598   | 0.540  | 1.426  |
| Asian                   | 0.629  | 0.187 | 0.119   | 0.351  | 1.127  |
| More than one           | 0.728  | 0.244 | 0.345   | 0.377  | 1.406  |
| Other                   | 1.560  | 0.392 | 0.078   | 0.952  | 2.553  |
| Unreported              | 0.981  | 0.117 | 0.873   | 0.776  | 1.240  |
