# Supplementary material for: Noninferiority of Silver Diamine Fluoride vs Sealants for Reducing Dental Caries Prevalence and Incidence: A Randomized Clinical Trial
Source: PubMed Central journal article supplement (PMC10913007; doi:10.1001/jamapediatrics.2023.6770), 2024-03-04
Supplement: jamapediatr-e236770-s003.pdf [file jamapediatr-e236770-s003.pdf]

## Data Sharing Statement

Ruff. Noninferiority of Silver Diamine Fluoride vs Sealants for Reducing Dental Caries Prevalence and Incidence. *JAMA Pediatr.* Published February 26, 2024.

doi:10.1001/jamapediatrics.2023.6770

### Data

**Data available:** Yes

**Data types:** Data dictionary, Other (please specify)

**Additional Information:** De-identified data upon request and completion of a data use agreement

**How to access data:** Interested researchers should send data requests to the corresponding author, [ryan.ruff@nyu.edu](mailto:ryan.ruff@nyu.edu)

**When available:** With publication

### Supporting Documents

**Document types:** Informed consent form

**How to access documents:** Interested researchers should send data requests to the corresponding author, [ryan.ruff@nyu.edu](mailto:ryan.ruff@nyu.edu)

**When available:** With publication

### Additional Information

**Who can access the data:** Researchers whose proposed use of the data has been approved.

**Types of analyses:** For any purpose.

**Mechanisms of data availability:** After approval of a proposal and a signed data use access agreement.
